1

Article

2

## **Progressively more subtle aggregation avoidance strategies**

3

## **mark a long-term direction to protein evolution**

4

Authors: S.G. Foy<sup>1,2</sup>, B.A. Wilson<sup>1</sup>, M.H.J. Cordes<sup>3</sup>, J. Masel<sup>1\*</sup>

5

Affiliations:

6

<sup>1</sup>Department of Ecology and Evolutionary Biology, University of Arizona.

7

<sup>2</sup>present address: St. Jude Children's Research Hospital, Memphis, Tennessee.

8

<sup>3</sup>Department of Chemistry & Biochemistry, University of Arizona.

9

10 \*Correspondence to: [masel@email.arizona.edu](mailto:masel@email.arizona.edu)

11

12 Short title: Long-term directionality of protein evolution

13 Keywords: phylostratigraphy, gene age, aggregation propensity, protein folding, protein

14 misfolding

15

## Abstract

16 To detect a direction to evolution, without the pitfalls of reconstructing ancestral states, we  
17 need to compare “more evolved” to “less evolved” entities. But because all extant species have  
18 the same common ancestor, none are chronologically more evolved than any other. However,  
19 different gene families were born at different times, allowing us to compare young protein-  
20 coding genes to those that are older and hence have been evolving for longer. To be retained  
21 during evolution, a protein must not only have a function, but must also avoid toxic dysfunction  
22 such as protein aggregation. There is conflict between the two requirements; hydrophobic  
23 amino acids form the cores of protein folds, but also promote aggregation. Young genes have a  
24 hydrophilic amino acid composition, which is presumably the simplest solution to the  
25 aggregation problem. Young genes’ few hydrophobic residues are clustered near one another  
26 along the primary sequence, presumably to assist folding. Later evolution increases  
27 hydrophobicity, increasing aggregation risk. This risk is counteracted by more subtle effects in  
28 the ordering of the amino acids, including a reduction in the clustering of hydrophobic residues  
29 until they eventually become more dispersed than if distributed randomly. This dispersion has  
30 previously been reported to be a general property of proteins, but here we find that it is  
31 restricted to old genes. Quantitatively, the index of dispersion delineates a gradual trend, i.e. a  
32 decrease in the clustering of hydrophobic amino acids over billions of years.

33

34

## Introduction

35 Proteins need to do two things to ensure their evolutionary persistence: fold into a functional  
36 conformation whose structure and/or activity benefit the organism, and also avoid folding into  
37 harmful conformations. Amyloid aggregates are a generic structural form of any polypeptide,  
38 and so pose a danger for all proteins (Monsellier and Chiti 2007). Several lines of evidence  
39 suggest that aggregation avoidance is a critical constraint during protein evolution. Highly  
40 expressed genes are less aggregation-prone (Tartaglia et al. 2007), and evolve more slowly due  
41 to greater selective constraint against alleles that increase the proportion of mistranslated  
42 variants that misfold (Drummond et al. 2005; Drummond and Wilke 2008). Genes that homo-  
43 oligomerize or are essential (Chen and Dokholyan 2008) or that degrade slowly (De Baets et al.  
44 2011) are also less aggregation-prone. Aggregation-prone stretches of amino acids tend to have  
45 translationally optimal codons (Lee et al. 2010), and be flanked by “gatekeeper” residues  
46 (Rousseau et al. 2006). Disease mutations are enriched for aggregation-promoting changes (De  
47 Baets et al. 2015; Reumers et al. 2009), and known aggregation-promoting patterns are  
48 underrepresented in natural protein sequences (Broome and Hecht 2000; Buck et al. 2013).  
49 Thermophiles, whose amino acids need to be more hydrophobic, show exaggerated  
50 aggregation-avoidance patterns (Thangakani et al. 2012).

51 Here we ask whether and how proteins get better at avoiding aggregation during the course of  
52 evolution. Absent a fossil record or a time machine, biases introduced during the inference of  
53 ancestral protein states (Trudeau et al. 2016; Williams et al. 2006) make it difficult to assess  
54 how past proteins systematically differed from their modern descendants. We have therefore  
55 developed an alternative method to study protein properties as a function of evolutionary age,  
56 one that does not rely on ancestral sequence reconstruction.

57 While all living species share a common ancestor, all proteins do not. It has become clear that  
58 protein-coding genes are not all derived by gene duplication and divergence from ancient  
59 ancestors, but instead continue to originate *de novo* from non-coding sequences (McLysaght  
60 and Guerzoni 2015). Different gene families (i.e. sets of homologous genes) therefore have  
61 different ages, and the properties of a gene can be a function of age.

62 The age of a gene can be estimated by means of its “phylostratum”, which is defined by the  
63 basal phylogenetic node shared with the most distantly related species in which a homolog of  
64 the gene in question can be found (Domazet-Lošo et al. 2007). Failure to find a still more  
65 distantly related protein homolog (i.e. failure of a gene to appear older) can have multiple  
66 causes. First, more distantly related homologs might not exist, as a consequence of de novo  
67 gene birth either from intergenic sequences or from the alternative reading frame of a different  
68 protein-coding gene (the latter yielding nucleotide but not amino acid homology). Second,  
69 apparent age might indicate the time not of de novo birth but of horizontal gene transfer (HGT)  
70 from a taxon for which no homologous genes have yet been sequenced. Third, independent  
71 loss of the entire gene family in multiple distantly related lineages can yield a pattern of  
72 apparent gain. Fourth, divergence between gene duplicates might be so extreme that  
73 homology can no longer be detected.

74 The diversity of sequenced taxa now available makes the second possibility (HGT) increasingly  
75 unlikely, especially outside microbial taxa that experience high levels of HGT; here we minimize  
76 this possibility by focusing on the set of mouse genes. The same wealth of sequenced taxa also  
77 makes the third possibility (phylogenetically independent loss of the entire gene family)  
78 unlikely, given the large number of independent loss events implied. More importantly, neither  
79 HGT nor independent loss are likely to drive systematic trends in protein properties as a  
80 function of apparent gene age; instead, they are likely to dilute any underlying patterns  
81 resulting from other determinants of apparent gene age.

82 Most critiques of the interpretation of phylostratigraphy in de novo gene terms therefore focus  
83 on the fourth possibility, specifically the concern that trends may be driven by biases in the  
84 degree to which homology is detectable (Albà and Castresana 2007; Moyers and Zhang 2016,  
85 2017, 2015). In particular, homology is harder to detect for shorter and faster-evolving proteins,  
86 which might therefore appear to be young, giving false support to the conclusion that young  
87 genes are shorter and faster-evolving. The problem of homology detection bias extends to any  
88 trait that is correlated with primary factors, such as length or evolutionary rate, that directly  
89 affect homology detection. We previously studied such a trait, intrinsic structural disorder (ISD),  
90 and found that statistically correcting for evolutionary rate did not affect the results, and that

91 statistically correcting for length made them stronger (Wilson et al. 2017). This suggested that  
92 the pattern in ISD was likely driven by time since de novo gene birth, rather than by homology  
93 detection bias.

94 Here we trace a number of other protein properties as a function of apparent gene family age,  
95 including aggregation propensity and hydrophobicity, and find a particularly striking trend for  
96 the degree to which hydrophobic residues are clustered along the primary sequence. This  
97 trend, as with the previous ISD work, experiences negligible change after correction for length,  
98 evolutionary rate, and expression, and is thus not a result of homology detection bias. Our  
99 results point to a systematic shift in the strategies used by proteins to avoid aggregation, as a  
100 function of the amount of evolutionary time for which they have been evolving.

## 101 **Results**

102 We assigned mouse genes to gene families and to times of origin, and assigned a protein  
103 aggregation propensity score to each protein on the basis of its amino acid sequence (see  
104 Methods). No clear trend is seen in aggregation propensity as a function of gene age (Fig. 1),  
105 although all genes (black) show lower aggregation propensity than would be expected if  
106 intergenic mouse sequences were translated into polypeptides (blue). Note that intergenic  
107 sequences represent not only the raw material from which de novo genes could emerge, but  
108 also the fate of any sequence, e.g. a horizontally transferred gene, that is subjected to neutral  
109 mutational processes.

110 However, striking patterns emerge when we decompose aggregation avoidance into the effect  
111 of amino acid composition (with hydrophobic amino acids making aggregation more likely), and  
112 the effect of the exact order of a given set of amino acids. The contribution of amino acid  
113 composition alone can be assessed by scrambling the order of the amino acids (Fig. 2, bottom),  
114 revealing that young genes make greater use of amino acid composition to avoid aggregation.  
115 The pattern is mirrored by other measurements of the hydrophobicity of the amino acid  
116 composition (Fig. 2, top and middle, intrinsic structural disorder as per (Wilson et al. 2017)  
117 shown in Fig. S1), with the decline in hydrophilicity taking place over ~200 million years.  
118 Previously reported differences in the aggregation propensity (Tartaglia et al. 2005) and

119 hydrophobicity (Mannige et al. 2012) of proteomes from different organisms might therefore  
120 be accounted for by systematic variation among species in the composition of old vs. young  
121 genes; in our analysis, all proteins were taken from the same mouse species, removing this  
122 confounding factor.

123 The contribution of amino acid ordering alone, independent from amino acid composition, can  
124 be assessed as the difference between the aggregation propensity of the actual protein and  
125 that of a scrambled version of the protein. We expected real proteins to be less aggregation-  
126 prone than their scrambled controls (Buck et al. 2013), and confirmed this for the very oldest  
127 proteins (Fig. 3, orange confidence intervals for genes shared with prokaryotes lie below 0). But  
128 surprisingly, the opposite was true for young genes (Fig. 3, orange confidence intervals for  
129 phylostrata from metazoa onward lie above 0). In other words, they are more aggregation-  
130 prone than would be expected from their amino acid composition alone.

131 One possible source of increased aggregation propensity is if young genes, struggling to achieve  
132 any kind of fold at all given their low hydrophobicity (Dill 1990), cluster their few hydrophobic  
133 amino acid residues closer together along the sequence. Such clustering could allow proteins to  
134 evolve small, foldable, potentially functional domains within an otherwise disordered sequence  
135 (Uversky et al. 2000). Alternatively and still more primitively, very highly localized clustering  
136 could produce short peptide motifs that cannot fold independently but acquire structure  
137 conditionally through binding or oligomerization (Davey et al. 2012; Gunasekaran et al. 2004).  
138 Hydrophobic clustering also increases the danger of aggregation (Monsellier et al. 2007);  
139 indeed, there is significant congruence between mutations that increase the stability of a fold  
140 and those that increase the stability of the aggregated or otherwise misfolded form (Sánchez et  
141 al. 2006).

142 We find that young genes do show hydrophobic clustering, while very old genes show  
143 interspersed hydrophobic amino acid residues (Fig. 4), and that this accounts for much of  
144 the excess aggregation propensity of young genes relative to scrambled controls (Fig. 3 blue  
145 points are closer to zero than orange points). Previous reports have suggested that the danger  
146 of aggregation selects against hydrophobic clustering (Monsellier et al. 2007). In other words,

147 among consecutive blocks of amino acids, the variance in hydrophobicity is lower than the  
148 mean, i.e. the index of dispersion is less than one in proteins overall (Irbäck et al. 1996;  
149 Schwartz et al. 2001) and in the core of protein folds (Patki et al. 2006). In the present analysis,  
150 this holds true only for old, highly evolved proteins. Younger proteins not only appear less  
151 evolutionarily constrained to intersperse polar and hydrophobic residues, but to the contrary,  
152 their hydrophobic residues show excess concentration near one another along the sequence,  
153 increasing aggregation propensity. Our results are extremely robust when we control for  
154 protein length, evolutionary rate, and expression level (Fig. S2). We also attempted to control  
155 for experimentally verified transmembrane status (use of sequence-based prediction would be  
156 problematically confounded), but found only 10 mouse transmembrane proteins plus 37 mouse  
157 proteins with human transmembrane homologs in the “Membrane Proteins of Known 3D  
158 Structure” database (Stansfeld et al. 2015) (<http://blanco.biomol.uci.edu/mpstruc/> accessed  
159 July 16, 2017) Unsurprisingly given their small number, the increased clustering of  
160 transmembrane proteins was not significant as a fixed effect within our linear model ( $p>0.05$ ).  
161 Transmembrane proteins showed the same trend in clustering as a function of age as did  
162 mouse genes as a whole.

163 Dispersion/clustering is a metric for which genes that have been evolving for longer have  
164 different properties from genes that are “less evolved”, creating a consistent direction of  
165 evolution over billions of years. This directionality of evolution can be interpreted as a slow  
166 shift from a primitive strategy for avoiding misfolding in young genes to more subtle strategies  
167 in old genes.

168 The primitive aggregation avoidance strategy used by young genes is simply to have a  
169 hydrophilic amino acid composition (Fig. 2), creating intrinsic structural disorder (Linding et al.  
170 2004; Thangakani et al. 2012; Wilson et al. 2017). Given such an amino acid composition, young  
171 genes might form an early folding nucleus by concentrating hydrophobic amino acids in  
172 localized regions of the sequence (Fig. 4, right), while still keeping total hydrophobicity and  
173 hence aggregation propensity within tolerable limits (Figs. 1-2). Such a folding nucleus would  
174 not necessarily be an entire independently folded domain. In particular, some origin theories  
175 posit that ancient proteins first achieved folding by becoming structured only upon binding to

176 some interaction partner (Soding and Lupas 2003; Zhu et al. 2016). In contemporary proteins,  
177 potential representatives of nascent structure are found in intrinsically disordered proteins that  
178 contain peptide-length binding motifs (small linear interaction motifs; SLiMs), many of which  
179 become ordered when bound to a partner (Davey et al. 2012). We do not, however, find that  
180 young genes have more known SLiMs (Fig. S3).

181 In contrast to young genes, older genes have higher hydrophobicity, which must be offset by  
182 the evolution of other aggregation-avoidance strategies (Thangakani et al. 2012). For such  
183 changes to occur through descent with modification probably happens only slowly. Changing  
184 the amino acid composition of a protein takes ~200 million years (Figs. 2 and S1); changing the  
185 index of dispersion requires such a large number of changes that it is extraordinarily slower,  
186 with a consistent direction to evolution visible over the entire history of life back to our  
187 common ancestor with prokaryotes.

188 Note that our very youngest phylostratum, of mouse genes shared only with rats, shows less  
189 clustering than other young genes, suggesting that rapid change in the index of dispersion may  
190 be possible (in the other direction) after all, on short and recent timescales. However, very  
191 young gene families are subject to significantly higher death rates than other gene families  
192 (Palmieri et al. 2014). With gene family loss so common at first, it is possible that the rapid  
193 initial increase in clustering is due to differential retention of gene families with highly clustered  
194 amino acids. This interpretation of the data is consistent with explaining how slow the later fall  
195 in clustering is, by positing that descent with modification is constrained to change clustering  
196 values slowly.

197 The youngest genes show similar clustering to what would be expected were intergenic  
198 sequences to be translated (Fig. 4, blue). Clustering of amino acids translated from non-coding  
199 intergenic sequences is a direct consequence of the clustering of nucleotides; indices of  
200 dispersion at the nucleotide level are all above the expectation of one from a Poisson process,  
201 in the range 1.2-1.9 for intergenic sequences and 1.1-1.8 for masked intergenic sequences,  
202 depending on which nucleotides are considered. (The lowest indices are found for the GC vs. AT  
203 contrast, presumably due to avoidance of CpG sites causing a general paucity of clusters of G



204 and C.) Very short tandem duplications, e.g. as may arise from DNA polymerase slippage,  
205 automatically create segments in which the duplicated nucleotide is overrepresented; observed  
206 nucleotide clustering values greater than one can therefore be interpreted as a natural  
207 consequence of mutational processes. The consequence of this mutational pattern is therefore  
208 a small and fortuitous degree of preadaptation, i.e. intergenic sequences have a systematic  
209 tendency toward higher clustering than “random”, in a manner that facilitates the de novo birth  
210 of new genes.

## 211 **Discussion**

212 As discussed in the Introduction, apparent gene family age can be a function of time since i)  
213 gene birth, ii) HGT, iii) divergence from other phylogenetic branches all of which have  
214 independently lost all members of the gene family, or iv) rapid divergence of a gene made  
215 homology undetectable. In all cases, our results describe evolutionary outcomes as a function  
216 of time elapsed since that event. In the case of our primary result on clustering, this means that  
217 genes appear with clustering values similar to those expected from intergenic sequences, are  
218 retained only if their clustering is exceptionally high, and then show gradual declines in  
219 clustering after that.

220 We believe that gene birth is the most plausible driver of our results. HGT is rare in more recent  
221 ancestors of mice, simultaneous loss in so many branches is unlikely, and statistical correction  
222 for evolutionary rate, length and expression (Fig. S2) has, in contradiction to the predictions of  
223 homology detection bias, a negligible effect on our results. However, our results on the  
224 evolution of protein properties following a defining event remain of interest under all scenarios  
225 of what the gene-age-determining event is.

226 There are three ways to explain subsequent patterns as a function of gene family age. The two  
227 mentioned so far are biases in retention after birth, and descent with modification. The third  
228 possibility is that the conditions of life were significantly different at different times, and hence  
229 so were the biochemical properties of proteins born/transferred/rapidly diverged at that time.  
230 Specifically, ancestral sequence reconstruction techniques have been used to infer that  
231 proteins in our ancestral lineage became progressively less thermophilic (Gaucher et al. 2008).

232 This might explain why young genes are more hydrophilic; they were born at more permissive  
233 lower temperatures. However, ancestral reconstruction techniques are likely biased toward  
234 consensus amino acids that are fold-stabilizing (Bloom and Glassman 2009; Godoy-Ruiz et al.  
235 2004; Lehmann et al. 2000; Steipe et al. 1994) and hence may be more hydrophobic (Trudeau  
236 et al. 2016; Williams et al. 2006). Alarming, ancestral reconstruction also suggests that the  
237 ancestral mammal was a thermophile (Trudeau et al. 2016). What is more, the main trend that  
238 we see of hydrophobicity/thermophilicity as a function of gene age is on shorter timescales;  
239 billions of years of common evolution has erased the differences in starting points. It is the  
240 more subtle signal of hydrophobic amino acid dispersion that shows the long-term pattern.  
241 However, variation in the conditions of life at the time of gene origin remains a plausible  
242 explanation for the idiosyncratic differences between phylostrata, i.e. for the remaining,  
243 statistically meaningful deviations of individual phylostrata from the trends reported here.

244 We have already invoked differential retention as a possible driver of the short-term  
245 evolutionary increase in the clustering values of young genes. It is logically possible that the  
246 long-term trend in clustering values is also a result of differential retention; if gene families with  
247 higher clustering values are more likely to be lost, different gene ages represent different spans  
248 of time in which this loss has had an opportunity to occur. Given the billion year time scales and  
249 thus enormous number of lost gene families this implies, this seems at present a less plausible  
250 scenario than descent with modification for different durations following different dates of  
251 origin. In other words, descent with modification seems the most plausible of the three possible  
252 drivers of biochemical patterns as a function of gene age, independently of what exactly “gene  
253 age” means.

254 Note that our findings go in the opposite direction to those of Mannige et al. (2012), who used  
255 more speciation-dense branches as a proxy for longer effective evolutionary time intervals, to  
256 infer an evolutionary trend away from, rather than toward, hydrophobicity. Part of this  
257 discrepancy (“oiliness” in Fig. 2 is the same metric as used in their work) may arise from  
258 differences in which proteins are present in which species, which could be a confounding factor  
259 when Mannige et al. (2012) attributed proteome-wide trends to descent with modification.  
260 Mannige et al. (2012) also confirmed their results for single genes, but did not, in that portion

261 of their analysis, also confirm that results were not sensitive to the difficulty of scoring  
262 speciation-density in prokaryotes.

263 We propose that our findings may be best explained by three phases of protein evolution under  
264 selection for proteins that both avoid misfolding and have a function. First, a filter during the  
265 gene birth process gives rise to low hydrophobicity in newborn genes (Wilson et al. 2017), as  
266 the simplest way to avoid misfolding. Second, young genes with their few hydrophobic amino  
267 acids clustered together are more likely to have functional folds that remain adaptive for some  
268 time after birth, and so are differentially retained in the period immediately after birth (when  
269 young genes are subject to very high rates of attrition (Palmieri et al. 2014)). Finally these two  
270 initial trends are both slowly reversed by descent with modification, continuing over billions of  
271 years of evolutionary search for better solutions for exceptions to the intrinsic correlation  
272 between propensity to fold and propensity to misfold.

273 The protein folding problem is notoriously hard. Here we see that it isn't just hard for human  
274 biochemists – it's so hard that evolution struggles with it too. Proteins evolve to find stable  
275 folds despite the correlated and ever-present danger of aggregation. They do so via a slow  
276 exploration of an enormous sequence space, a search that has yet to saturate after billions of  
277 years (Povolotskaya and Kondrashov 2010). Given the enormous space that has already been  
278 searched, existing protein folds, especially of older gene families, may therefore be a highly  
279 unrepresentative sample of the typical behaviors of polypeptide chains. Protein folds are best  
280 thought of as a collection of corner cases and idiosyncratic exceptions, which are hard to find  
281 even for evolution, let alone for our “free-modeling” techniques to predict ab initio.

## 282 **Materials and Methods**

283 *M. musculus* proteins from Ensembl (v73) were assigned gene families and gene ages as  
284 described elsewhere (Wilson et al. 2017). To briefly outline this previous procedure, BLASTp  
285 (Altschul et al. 1997) against the National Center for Biotechnology Information (NCBI) nr  
286 database with an E-value threshold of 0.001 was used for preliminary age assignments for each  
287 gene, followed by a variety of quality filters. Genes unique to one species were excluded due to  
288 the high rate of sequences falsely annotated as protein-coding genes, leaving Rodentia as the

289 youngest phylostratum. Paralogous genes were clustered into gene families, and a single age  
290 was reconciled per gene family, which filtered out some inconsistent performance of BLASTp.  
291 Numbers of genes and gene families in each phylostratum can be found in Table S1 of Wilson et  
292 al. (2017). “Cellular Organisms” contains all mouse gene families that share homology with a  
293 prokaryote.

294 Intergenic control sequences were also taken from previous work (Wilson et al. 2017), including  
295 the Masked Control sequences taken only from RepeatMasked (Smit et al. 2015) intergenic  
296 sequences. Briefly, one intergenic control sequence per gene was taken 100nt downstream  
297 from the end of the 3' end of the transcript, with stop codons excised until a length match to  
298 the neighboring protein-coding gene was obtained. A second control sequence per gene began  
299 100nt further downstream. This choice of location ensures that control sequences are  
300 representative of genomic regions in which protein-coding genes are found.

301 Aggregation propensity was scored using TANGO (Fernandez-Escamilla et al. 2004) and Waltz  
302 (Maurer-Stroh et al. 2010). We counted the number of amino acids contained within runs of at  
303 least five consecutive amino acids scored to have >5% aggregation propensity, added 0.5, and  
304 divided by protein length to obtain a measure of the density of aggregation-prone regions. For  
305 those scores derived using TANGO, we then performed a Box-Cox transformation ( $\lambda=0.362$ ,  
306 optimized using only coding genes not controls) prior to linear model analysis in Figs. 1 and S1.  
307 Central tendency estimates and confidence intervals were then back transformed for the plots.  
308 Paired differences in TANGO scores or Waltz scores between genes and scrambled controls  
309 were not transformed. Results were qualitatively indistinguishable when runs of at least six  
310 consecutive amino acids were analyzed instead of runs of at least five.

311 The index of dispersion was assessed by comparing the variance in hydrophobicity between  
312 blocks of  $s = 6$  consecutive amino acids to the mean hydrophobicity (Irbäck et al. 1996). Result  
313 for different values of  $s$  yielded qualitatively similar results. Where the amino acid length was  
314 not divisible by six, an average was taken over all phases for the blocking procedure, with a few  
315 amino acids neglected at each end yielding a truncated length of  $N$ . Following past practice,  
316 amino acid sequences were transformed into binary hydrophobicity strings by taking the six

317 amino acids Leu, Ile, Val, Phe, Met, and Trp as hydrophobic (+1) and the other amino acids as  
318 hydrophilic (-1), summing to a value  $\sigma_k$  for each block  $k = 1, \dots, N/s$  and  $M = \sum_{k=1}^{N/s} \sigma_k$  overall  
319 (Irbäck and Sandelin 2000). The normalized index of dispersion

$$320 \quad \psi = \frac{s}{N} \sum_{k=1}^{N/s} \frac{1}{K} (\sigma_k - sM/N)^2,$$

321 where the normalization factor for length  $N$  and total hydrophobicity  $M$  of a protein is

$$322 \quad K = s \frac{N^2 - M^2}{N^2 - N} \left(1 - \frac{s}{N}\right).$$

323 For randomly distributed amino acids of any length  $N$  and hydrophobicity  $M$ , this normalization  
324 makes the expectation of  $\psi$  equal to 1. For nucleotide dispersion, blocks of length  $s = 18$   
325 rather than 6 were used. Nucleotide dispersion scores were calculated for each possible  
326 permutation as to which nucleotides were scored as +1 and which as -1 (e.g. G and C as +1 and  
327 A and T as -1 constitutes one permutation). Amino acid dispersion values  $\psi$  were Box-Cox  
328 transformed ( $\lambda = -0.295$ ) prior to use in linear models.

329 To generate a scrambled control sequence that is paired to each gene, we simply sampled its  
330 amino acids without replacement. To generate dispersion-controlled scrambled sequences,  
331 1000 scrambled sequences of each protein were produced, and the one that most closely  
332 matched the index of dispersion of the focal gene was retained. This left the average gene with  
333 a clustering value 0.0035 higher than its matched control, with the mean difference of the  
334 absolute deviation between a gene and its matched control equal to 0.0057, showing a close  
335 match with little directional bias.

336 Source data for the statistical analyses and figures are provided in Supplementary Tables S1-S6.  
337 Code associated with generating and analyzing these tables is publicly available at  
338 <https://github.com/MaselLab>.

339 **Acknowledgments:** This work was supported by the John Templeton Foundation (39667), and  
340 the National Institutes of Health (GM104040). The funders had no role in study design, data  
341 collection and analysis, decision to publish, or preparation of the manuscript. We thank Rafik

342 Neme for insightful discussions and Joost Schymkowitz and Rob van der Kant of the VIB Switch  
 343 Laboratory for providing us with a stand-alone Waltz script.

344

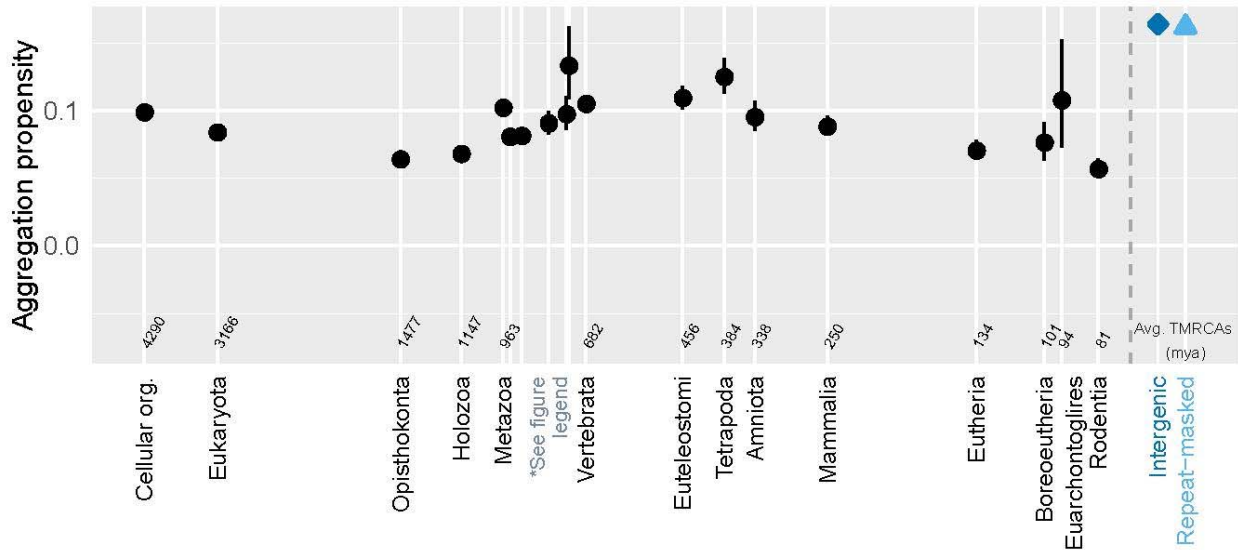

345

346 **Fig. 1.** Mouse genes show little pattern in aggregation propensity (assessed via TANGO) as a function of  
 347 age. Genes (black) show less aggregation propensity than intergenic controls (blue). Back-transformed  
 348 central tendency estimates +/- one standard error come from a linear mixed model, where gene family  
 349 and phylostratum are random and fixed terms respectively. Importantly, this means that we do not treat  
 350 genes as independent data points, but instead take into account phylogenetic confounding, and use  
 351 gene families as independent data points. Times to most recent common ancestor (TMRCAs) were taken  
 352 from TimeTree.org (Kumar et al. 2017) on February 18, 2016. We used the arithmetic means of the  
 353 TMRCAs of the focal taxon shown on the x-axis and the preceding taxon (i.e. the estimated midpoint of  
 354 the interior branch of the tree), and these times are displayed on a log scale. Cellular organism age is  
 355 shown as the midpoint of the last universal common ancestor and the last eukaryotic common ancestor.  
 356 The taxon names omitted for space reasons follow the sequence Metazoa, Eumetazoa, Bilateria,  
 357 Deuterostomia, Chordata, Olfactores, Vertebrata.

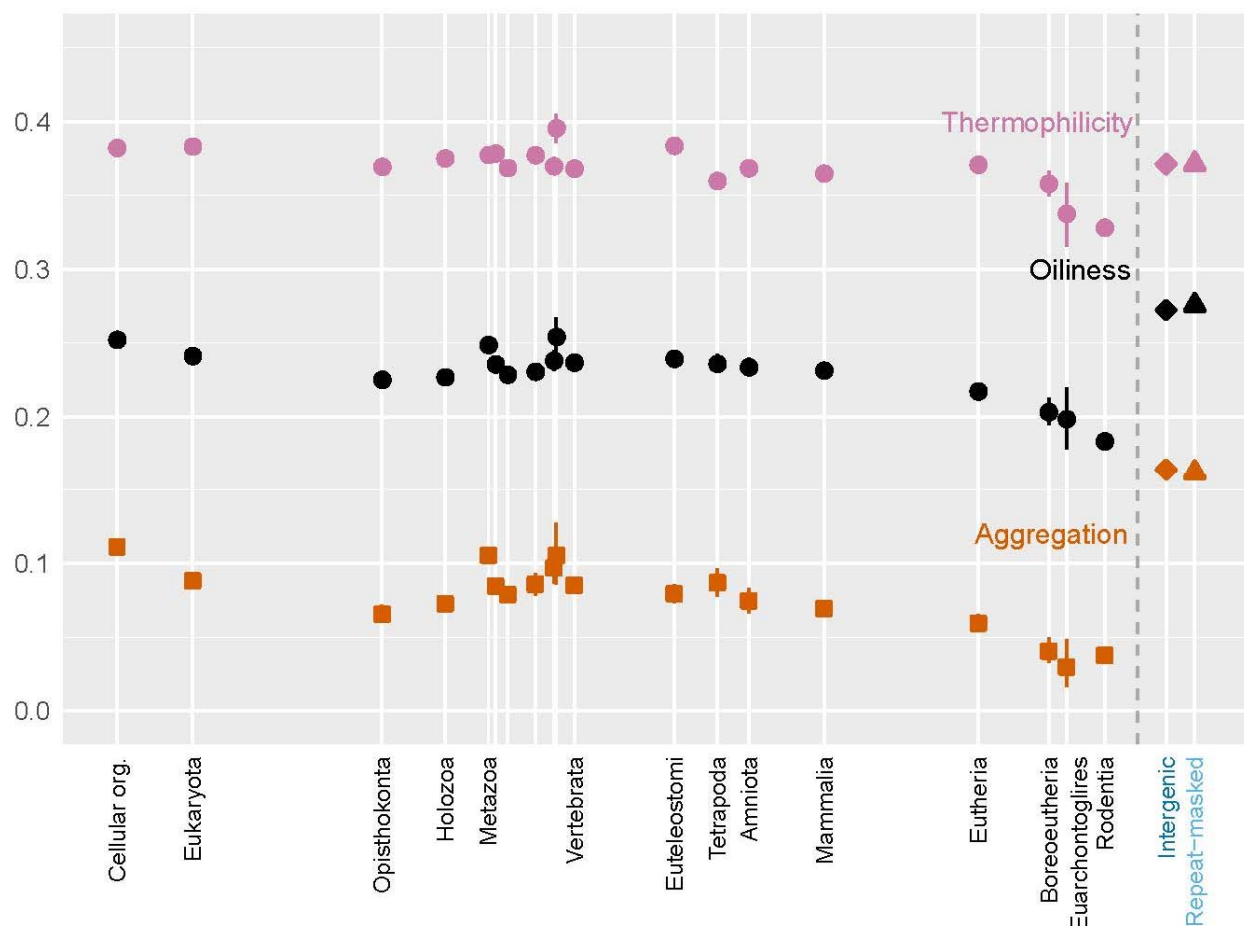

358 **Fig. 2.** Three different measures for the hydrophobicity of the amino acid content as a function of gene  
359 family age. “Aggregation” represents the TANGO results from scrambled versions of genes, and hence  
360 captures the effect of amino acid composition on whatever TANGO captures. The use of scrambled  
361 genes is indicated by squares, with unscrambled genes as circles and intergenic controls as diamonds or  
362 triangles depending on whether repeat sequences are excluded. Oiliness represents the content  
363 (between 0 and 1) of the four most hydrophobic amino acids, FILV, as used in the analysis of Mannige et  
364 al. (2012), subjected to a Box-Cox transform with  $\lambda= 0.869$  prior to model fitting. Thermophily  
365 represents the content of ILVYWRE, as analyzed by Boussau et al. (2008), subjected to a Box-Cox  
366 transform with  $\lambda= 2.412$  prior to model fitting; thermophily is dominated by the same general  
367 hydrophobicity trend as the other two measures. The hydrophobicity measurement of Irbäck et al.  
368 (1996), namely content of FILVMW, is not shown, but is indistinguishable from the FILV oiliness  
369 measure. While the trend as a function of gene age is similar in each case, the aggregation measurement  
370 shows the most striking deviation from intergenic control sequences. Back-transformed central  
371 tendency estimates +/- one standard error come from a linear mixed model, where gene family and  
372 phylostratum are random and fixed terms respectively. The x-axis is the same as for Figure 1.

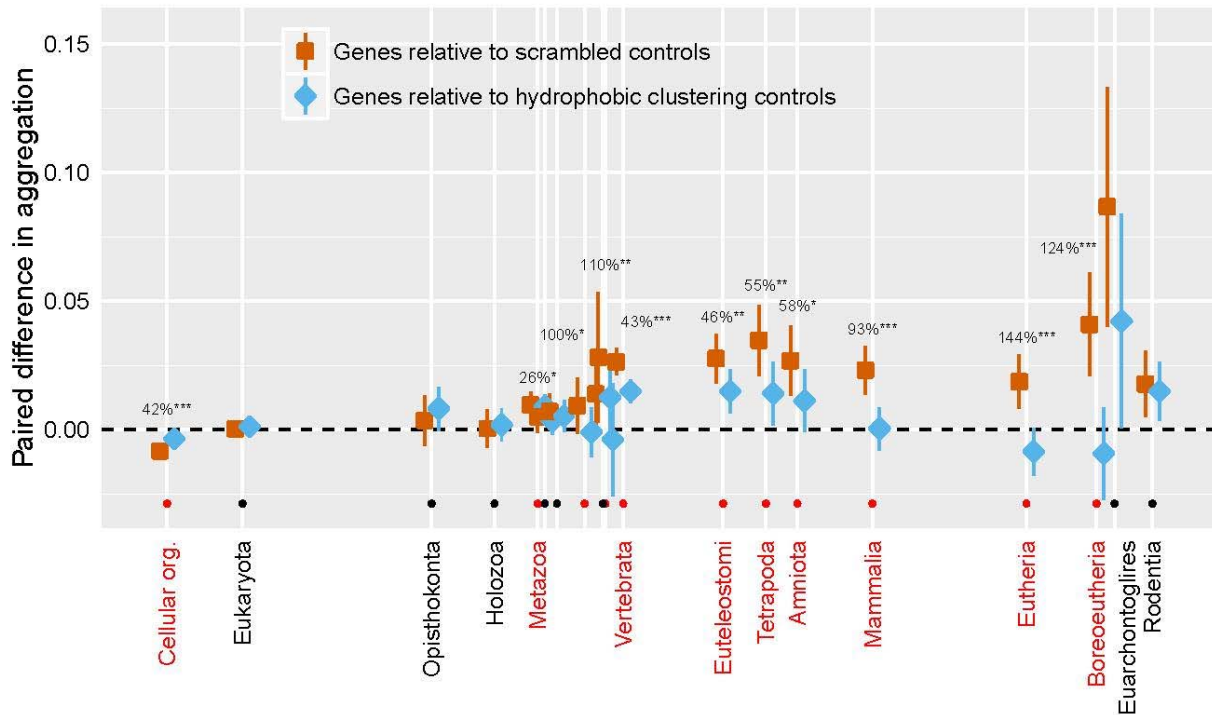

373

374 **Fig. 3.** Only very old genes have aggregation propensities lower than that expected from their amino  
375 acid composition alone (orange < dashed line indicating expectation of 0). This puzzling finding is  
376 reduced when we account for dispersion (blue is closer than orange is to the 0 dashed line) using a  
377 scrambled sequence that is controlled to have a similar dispersion value. The clustering of hydrophobic  
378 amino acids in young genes acts to increase their aggregation propensity. 95% confidence intervals are  
379 shown, based on a linear mixed model where gene family and phylostratum are random and fixed terms  
380 respectively. Note that blue and orange confidence intervals should be compared only to the reference  
381 value of zero, and not to each other, due to the paired nature of the data. For phylostrata shown in red  
382 and indicated by an orange dot, the difference between blue and orange was significant ( $*p < 0.01$ ,  
383  $**p < 0.001$ ,  $***p < 0.0001$ ), and the percentage of deviation from 0 accounted for by the control is  
384 shown. For most phylostrata where the difference between blue and orange was non-significant  
385 (indicated by a black dot and black text), the orange deviated little from 0, so there was little or nothing  
386 for the blue clustering control to account for. Results are shown for TANGO; results for Waltz trend in  
387 the same direction but are weaker (Fig. S4). The x-axis is the same as for Figure 1.

388

389



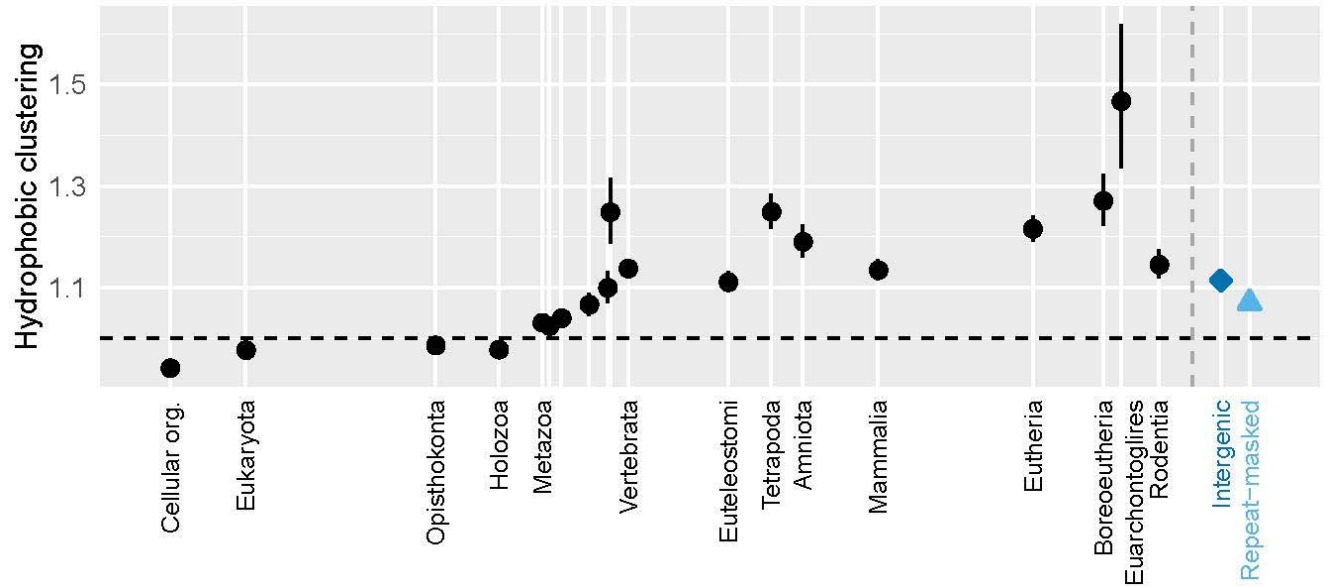

390

391 **Fig. 4.** Clustering initially follows that of its raw material, and evolves rapidly upward at first, but then  
392 decays downward extremely slowly, indicating a long-term direction of evolution. Only the oldest genes  
393 have hydrophobic amino acids spread out from each other, as previously reported; young genes have  
394 clustered hydrophobic amino acids. Back-transformed central tendency estimates  $\pm$  one standard error  
395 come from a linear mixed model, where gene family and phylostratum are random and fixed terms  
396 respectively. The x-axis is the same as for Figure 1.

397

## References

- 398 Albà MM, Castresana J 2007. On homology searches by protein Blast and the characterization of the age  
399 of genes. *BMC Evol Biol* 7: 1-8. doi: 10.1186/1471-2148-7-53
- 400 Altschul SF, Madden TL, Schäffer AA, Zhang J, Zhang Z, Miller W, Lipman DJ 1997. Gapped BLAST and PSI-  
401 BLAST: a new generation of protein database search programs. *Nucleic Acids Res* 25: 3389-3402. doi:  
402 10.1093/nar/25.17.3389
- 403 Bloom JD, Glassman MJ 2009. Inferring Stabilizing Mutations from Protein Phylogenies: Application to  
404 Influenza Hemagglutinin. *PLoS Comput Biol* 5: e1000349.
- 405 Boussau B, Blanquart S, Neacsulea A, Lartillot N, Gouy M 2008. Parallel adaptations to high temperatures  
406 in the Archaean eon. *Nature* 456: 942-945. doi: 10.1038/nature07393
- 407 Broome BM, Hecht MH 2000. Nature disfavors sequences of alternating polar and non-polar amino  
408 acids: implications for amyloidogenesis1. *J Mol Biol* 296: 961-968. doi: 10.1006/jmbi.2000.3514
- 409 Buck PM, Kumar S, Singh SK 2013. On the Role of Aggregation Prone Regions in Protein Evolution,  
410 Stability, and Enzymatic Catalysis: Insights from Diverse Analyses. *PLoS Comput Biol* 9: e1003291. doi:  
411 10.1371/journal.pcbi.1003291
- 412 Chen Y, Dokholyan NV 2008. Natural Selection against Protein Aggregation on Self-Interacting and  
413 Essential Proteins in Yeast, Fly, and Worm. *Mol Biol Evol* 25: 1530-1533. doi: 10.1093/molbev/msn122
- 414 Davey NE, Van Roey K, Weatheritt RJ, Toedt G, Uyar B, Altenberg B, Budd A, Diella F, Dinkel H, Gibson TJ  
415 2012. Attributes of short linear motifs. *Molecular BioSystems* 8: 268-281. doi: 10.1039/C1MB05231D
- 416 De Baets G, Reumers J, Delgado Blanco J, Dopazo J, Schymkowitz J, Rousseau F 2011. An Evolutionary  
417 Trade-Off between Protein Turnover Rate and Protein Aggregation Favors a Higher Aggregation  
418 Propensity in Fast Degrading Proteins. *PLoS Comput Biol* 7: e1002090. doi:  
419 10.1371/journal.pcbi.1002090
- 420 De Baets G, Van Doorn L, Rousseau F, Schymkowitz J 2015. Increased Aggregation Is More Frequently  
421 Associated to Human Disease-Associated Mutations Than to Neutral Polymorphisms. *PLoS Comput Biol*  
422 11: e1004374. doi: 10.1371/journal.pcbi.1004374
- 423 Dill KA 1990. Dominant forces in protein folding. *Biochemistry* 29: 7133-7155. doi: 10.1021/bi00483a001
- 424 Domazet-Lošo T, Brajković J, Tautz D 2007. A phylostratigraphy approach to uncover the genomic history  
425 of major adaptations in metazoan lineages. *Trends Genet* 23: 533-539. doi: 10.1016/j.tig.2007.08.014
- 426 Drummond DA, Bloom JD, Adami C, Wilke CO, Arnold FH 2005. Why highly expressed proteins evolve  
427 slowly. *Proc Natl Acad Sci USA* 102: 14338-14343. doi: 10.1073/pnas.0504070102
- 428 Drummond DA, Wilke CO 2008. Mistranslation-Induced Protein Misfolding as a Dominant Constraint on  
429 Coding-Sequence Evolution. *Cell* 134: 341-352.
- 430 Fernandez-Escamilla AM, Rousseau F, Schymkowitz J, Serrano L 2004. Prediction of sequence-dependent  
431 and mutational effects on the aggregation of peptides and proteins. *Nat Biotechnol* 22: 1302-1306. doi:  
432 10.1038/nbt1012
- 433 Gaucher EA, Govindarajan S, Ganesh OK 2008. Palaeotemperature trend for Precambrian life inferred  
434 from resurrected proteins. *Nature* 451: 704-707. doi: 10.1038/nature06510

- 435 Godoy-Ruiz R, Perez-Jimenez R, Ibarra-Molero B, Sanchez-Ruiz JM 2004. Relation Between Protein  
436 Stability, Evolution and Structure, as Probed by Carboxylic Acid Mutations. *J Mol Biol* 336: 313-318. doi:  
437 10.1016/j.jmb.2003.12.048
- 438 Gunasekaran K, Tsai C-J, Nussinov R 2004. Analysis of Ordered and Disordered Protein Complexes  
439 Reveals Structural Features Discriminating Between Stable and Unstable Monomers. *J Mol Biol* 341:  
440 1327-1341. doi: 10.1016/j.jmb.2004.07.002
- 441 Irbäck A, Peterson C, Potthast F 1996. Evidence for nonrandom hydrophobicity structures in protein  
442 chains. *Proc Natl Acad Sci USA* 93: 9533-9538.
- 443 Irbäck A, Sandelin E 2000. On Hydrophobicity Correlations in Protein Chains. *Biophysical Journal* 79:  
444 2252-2258. doi: 10.1016/S0006-3495(00)76472-1
- 445 Kumar S, Stecher G, Suleski M, Hedges SB 2017. TimeTree: A Resource for Timelines, Timetrees, and  
446 Divergence Times. *Mol Biol Evol* 34: 1812-1819. doi: 10.1093/molbev/msx116
- 447 Lee Y, Zhou T, Tartaglia GG, Vendruscolo M, Wilke CO 2010. Translationally optimal codons associate  
448 with aggregation-prone sites in proteins. *Proteomics* 10: 4163-4171.
- 449 Lehmann M, Pasamontes L, Lassen SF, Wyss M 2000. The consensus concept for thermostability  
450 engineering of proteins. *BBA-Protein Struct M* 1543: 408-415. doi: 10.1016/S0167-4838(00)00238-7
- 451 Linding R, Schymkowitz J, Rousseau F, Diella F, Serrano L 2004. A Comparative Study of the Relationship  
452 Between Protein Structure and  $\beta$ -Aggregation in Globular and Intrinsically Disordered Proteins. *J Mol*  
453 *Biol* 342: 345-353.
- 454 Mannige RV, Brooks CL, Shakhnovich EI 2012. A Universal Trend among Proteomes Indicates an Oily Last  
455 Common Ancestor. *PLoS Comput Biol* 8: e1002839. doi: 10.1371/journal.pcbi.1002839
- 456 Maurer-Stroh S, Debulpaep M, Kuemmerer N, Lopez de la Paz M, Martins IC, Reumers J, Morris KL,  
457 Copland A, Serpell L, Serrano L, Schymkowitz JW, Rousseau F 2010. Exploring the sequence  
458 determinants of amyloid structure using position-specific scoring matrices. *Nature Methods* 7: 237-242.
- 459 McLysaght A, Guerzoni D 2015. New genes from non-coding sequence: the role of de novo protein-  
460 coding genes in eukaryotic evolutionary innovation. *Phil Trans R Soc B* 370: 20140332. doi:  
461 10.1098/rstb.2014.0332
- 462 Monsellier E, Chiti F 2007. Prevention of amyloid-like aggregation as a driving force of protein evolution.  
463 *EMBO Rep* 8: 737-742. doi: 10.1038/sj.embor.7401034
- 464 Monsellier E, Ramazzotti M, de Laureto PP, Tartaglia G-G, Taddei N, Fontana A, Vendruscolo M, Chiti F  
465 2007. The Distribution of Residues in a Polypeptide Sequence Is a Determinant of Aggregation Optimized  
466 by Evolution. *Biophysical Journal* 93: 4382-4391. doi: 10.1529/biophysj.107.111336
- 467 Moyers BA, Zhang J 2016. Evaluating Phylostratigraphic Evidence for Widespread De Novo Gene Birth in  
468 Genome Evolution. *Mol Biol Evol* 33: 1245-1256. doi: 10.1093/molbev/msw008
- 469 Moyers BA, Zhang J 2017. Further Simulations and Analyses Demonstrate Open Problems of  
470 Phylostratigraphy. *Genome Biology and Evolution* 9: 1519-1527. doi: 10.1093/gbe/evx109
- 471 Moyers BA, Zhang J 2015. Phylostratigraphic Bias Creates Spurious Patterns of Genome Evolution. *Mol*  
472 *Biol Evol* 32: 258-267. doi: 10.1093/molbev/msu286
- 473 Palmieri N, Kosiol C, Schlötterer C 2014. The life cycle of *Drosophila* orphan genes. *eLife* 3: e01311. doi:  
474 10.7554/eLife.01311

- 475 Patki AU, Hausrath AC, Cordes MHJ 2006. High Polar Content of Long Buried Blocks of Sequence in  
476 Protein Domains Suggests Selection Against Amyloidogenic Non-polar Sequences. *J Mol Biol* 362: 800-  
477 809.
- 478 Povolotskaya IS, Kondrashov FA 2010. Sequence space and the ongoing expansion of the protein  
479 universe. *Nature* 465: 922-926. doi: 10.1038/nature09105
- 480 Reumers J, Maurer-Stroh S, Schymkowitz J, Rousseau F 2009. Protein sequences encode safeguards  
481 against aggregation. *Hum Mutat* 30: 431-437. doi: 10.1002/humu.20905
- 482 Rousseau F, Serrano L, Schymkowitz JWH 2006. How Evolutionary Pressure Against Protein Aggregation  
483 Shaped Chaperone Specificity. *J Mol Biol* 355: 1037-1047.
- 484 Sánchez IE, Tejero J, Gómez-Moreno C, Medina M, Serrano L 2006. Point Mutations in Protein Globular  
485 Domains: Contributions from Function, Stability and Misfolding. *J Mol Biol* 363: 422-432. doi:  
486 10.1016/j.jmb.2006.08.020
- 487 Schwartz R, Istrail S, King J 2001. Frequencies of amino acid strings in globular protein sequences  
488 indicate suppression of blocks of consecutive hydrophobic residues. *Protein Science* 10: 1023-1031. doi:  
489 10.1110/ps.33201
- 490 Smit A, Hubley R, Green P. 2015. RepeatMasker Open-4.0. Version 4.0.5.
- 491 Soding J, Lupas AN 2003. More than the sum of their parts: on the evolution of proteins from peptides.  
492 *BioEssays* 25: 837-846. doi: 10.1002/bies.10321
- 493 Stansfeld Phillip J, Goose Joseph E, Caffrey M, Carpenter Elisabeth P, Parker Joanne L, Newstead S,  
494 Sansom Mark SP 2015. MemProtMD: Automated Insertion of Membrane Protein Structures into Explicit  
495 Lipid Membranes. *Structure* 23: 1350-1361. doi: 10.1016/j.str.2015.05.006
- 496 Steipe B, Schiller B, Plückthun A, Steinbacher S 1994. Sequence Statistics Reliably Predict Stabilizing  
497 Mutations in a Protein Domain. *J Mol Biol* 240: 188-192. doi: 10.1006/jmbi.1994.1434
- 498 Tartaglia GG, Pechmann S, Dobson CM, Vendruscolo M 2007. Life on the edge: a link between gene  
499 expression levels and aggregation rates of human proteins. *Trends Biochem Sci* 32: 204-206.
- 500 Tartaglia GG, Pellarin R, Cavalli A, Caflich A 2005. Organism complexity anti-correlates with proteomic  
501  $\beta$ -aggregation propensity. *Protein Science* 14: 2735-2740. doi: 10.1110/ps.051473805
- 502 Thangakani AM, Kumar S, Velmurugan D, Gromiha MSM 2012. How do thermophilic proteins resist  
503 aggregation? *Proteins: Struct Funct Bioinf* 80: 1003-1015. doi: 10.1002/prot.24002
- 504 Trudeau DL, Kaltenbach M, Tawfik DS 2016. On the Potential Origins of the High Stability of  
505 Reconstructed Ancestral Proteins. *Mol Biol Evol* 33: 2633-2641. doi: 10.1093/molbev/msw138
- 506 Uversky VN, Gillespie JR, Fink AL 2000. Why are "natively unfolded" proteins unstructured under  
507 physiologic conditions? *Proteins* 41: 415-427. doi: 10.1002/1097-0134(20001115)41:3<415::AID-  
508 PROT130>3.0.CO;2-7 [pii]
- 509 Williams PD, Pollock DD, Blackburne BP, Goldstein RA 2006. Assessing the Accuracy of Ancestral Protein  
510 Reconstruction Methods. *PLoS Comput Biol* 2: e69. doi: 10.1371/journal.pcbi.0020069
- 511 Wilson BA, Foy SG, Neme R, Masel J 2017. Young genes are highly disordered as predicted by the  
512 preadaptation hypothesis of de novo gene birth. *Nature Ecology & Evolution* 1: 0146. doi:  
513 10.1038/s41559-017-0146

514 Zhu H, Sepulveda E, Hartmann MD, Kogenaru M, Ursinus A, Sulz E, Albrecht R, Coles M, Martin J, Lupas  
515 AN 2016. Origin of a folded repeat protein from an intrinsically disordered ancestor. eLife 5: e16761.  
516 doi: 10.7554/eLife.16761

517

518
